# Supplementary material
Source: PubMed Central journal article supplement (PMC4209982)
Supplement: pnas.201414020SI.pdf [file pnas.201414020SI.pdf]

# Supporting Information

Marriott et al. 10.1073/pnas.1414020111

## SI Materials and Methods

**Plant Growth.** All plants used in experimentation were sown in low nitrate soil (John Innes Seed Compost). Seeds were vernalized in the dark at 4–6 °C for 21 d before being transferred to the greenhouse at 20 °C with a 16-h light photoperiod. Watering was stopped ~10.5 wk after sowing, when plants had reached full maturity, and plants were harvested once they had completely dried.

**Saccharification Analysis.** Plant material was tested for saccharification using a liquid handling robotic platform (Tecan Evo 200; Tecan Group Ltd.) [see Gomez et al. (1)]. Plant material was pretreated with 0.5 M NaOH at 90 °C for 20 min, followed by enzymatic digestion performed at 50 °C for 8 h with shaking with a 4:1 mixture of Celluclast to Novozyme 188 (Novozymes). The key enzyme activity of Celluclast is cellulase that hydrolyzes (1,4)- $\beta$ -glucosidic linkages in cellulose and other beta-D-glucans into glucose, cellobiose, and higher glucose polymers. It is produced by submerged fermentation of the fungus *Trichoderma reesei* and has an activity of  $\geq 700$  endoglucanase units (EGU)/g ( $\mu\text{mol}$  reducing sugars released per gram of enzyme per minute). The key enzyme activity of Novozyme 188 is cellobiase that hydrolyzes cellobiose to glucose. It is obtained by submerged fermentation of an *Aspergillus niger* microorganism and has an activity of  $\geq 250$  cellobiase units (CBU)/g ( $\mu\text{mol}$  of glucose released per gram of enzyme per minute). The mixture of enzymes is diluted such that 7 filter paper units of enzyme is added per 1 mg of biomass. Saccharification potential was determined by measuring the amount of reducing sugars using a colorimetric assay using 3-methyl-2-benzothiazolinone hydrozone (MTBH) as described in ref. 1. Each plate contained standard reactions of 50 nmol, 100 nmol, and 150 nmol of glucose. Change in color was read with a Tecan Sunrise microplate absorbance reader at 620 nm.

**Fourier Transform Infrared Spectroscopy.** Fourier transform infrared (FTIR) spectra were measured using a Spectrum One (Perkin-Elmer) equipped with a diamond that allows collection of spectra directly on the sample without any sample preparation. Ground stem material from WT and *sac* plants was applied to the diamond, and a pressure arm was used to apply a constant pressure on the samples to ensure good contact between the sample and the IR beam. Spectra were acquired for the wavelength range 850–1,850  $\text{cm}^{-1}$  at a spectral resolution of 4  $\text{cm}^{-1}$ , and 256 scans were taken for each spectrum. Three spectra were collected for each sample, and the triplicate-averaged spectrum was used for principal component analysis (PCA). PCA was carried out using The Unscrambler software (CAMO). Spectra were normalized using peak normalization and were linear baseline corrected before performing PCA.

**Cell-Wall Composition Analysis.** To obtain alcohol insoluble residue (AIR), 100 mg of ground stem material was subject to 30 min incubation with shaking at room temperature, followed by centrifugation at 3,000  $\times g$  at 4 °C for 10 min and removal of the supernatant. The pellet was washed with the following solutions in this order: twice with chloroform:methanol (1:1, vol/vol), twice with 80% (vol/vol) methanol, and once with 100% methanol, after which samples were left to dry overnight at room temperature.

Lignin content was quantified using Foster et al.'s (2) acetyl bromide method, based on the method reported by Fukushima and Hatfield (3). Briefly, 3 mg of AIR was weighed into a 5-mL volumetric flask, and 250  $\mu\text{L}$  of freshly prepared acetyl bromide solution (25% vol/vol acetyl bromide in glacial acetic acid) was

added. Samples were incubated at 50 °C for 2 h, followed by a further 1 h with mixing every 15 min. Samples were cooled to room temperature, 1 mL of 2 M NaOH and 175  $\mu\text{L}$  of freshly prepared 0.5 M hydroxylamine hydrochloride were added, samples were taken to 5 mL with glacial acetic acid and mixed, and the absorption was read using a Shimadzu UV-1800 spectrophotometer at 280 nm. Lignin content ( $\mu\text{g}\cdot\text{mg}^{-1}$  cell wall) was determined using the following formula:

$$\begin{aligned} & (\text{absorbance} \div (\text{coefficient} \times \text{path length})) \\ & \times ((\text{total volume} \times 100\%) \div \text{biomass weight}). \end{aligned}$$

The coefficient is specific to the type of plant that is being analyzed, and, for grasses, a coefficient of 17.75 is used (3).

Crystalline cellulose content was analyzed using Foster et al.'s (4) method, based on the method reported by Updegraff (5). Briefly, 1 mL of Updegraff reagent [acetic acid:nitric acid:water (8:1:2, vol/vol/vol)] was added to 4 mg of AIR, heated at 100 °C for 30 min, cooled to room temperature, and centrifuged at 10,000  $\times g$  for 15 min. The pellet was washed four times with 1.5 mL of water, air dried, and incubated with 175  $\mu\text{L}$  of 72% (vol/vol)  $\text{H}_2\text{SO}_4$  for 45 min at room temperature. Samples were centrifuged at 10,000  $\times g$  for 15 min after adding 825  $\mu\text{L}$  of water. Finally, the glucose content of the supernatant was quantified using the colorimetric anthrone assay as follows: 10  $\mu\text{L}$  of each sample was added to a 96-well polystyrene microtiter plate with 90  $\mu\text{L}$  of water and 200  $\mu\text{L}$  of anthrone reagent (2 mg anthrone  $\text{mL}^{-1}$  concentrated  $\text{H}_2\text{SO}_4$ ). A standard curve for glucose (0  $\mu\text{g}$ , 2  $\mu\text{g}$ , 4  $\mu\text{g}$ , 6  $\mu\text{g}$ , 8  $\mu\text{g}$ , and 10  $\mu\text{g}$ ) was also added to each plate. The plate was heated at 80 °C for 30 min and allowed to cool, and the absorption was read at 620 nm using a Tecan Sunrise microplate.

Noncellulosic monosaccharide analysis was performed using high-performance anion exchange chromatography (HPAEC) (Carbopac PA-10; Dionex). AIR samples of 3 mg were hydrolyzed with 0.5 mL of 2 M trifluoroacetic acid (TFA) for 4 h at 100 °C, cooled to room temperature, and evaporated completely. The pellet was rinsed twice with 200  $\mu\text{L}$  of isopropanol, once with 500  $\mu\text{L}$  of water, and finally resuspended in 100  $\mu\text{L}$  of deionized water. Samples were filtered with 0.45- $\mu\text{m}$  polytetrafluoroethylene (PTFE) filters and separated by HPAEC as described in ref. 6. The separated monosaccharides were quantified by using external calibration with a mixture of seven monosaccharide standards at 100  $\mu\text{M}$  (arabinose, fucose, galactose, glucose, mannose, rhamnose, and xylose) that were subjected to acid hydrolysis in parallel with the samples.

Ester-bound ferulic acid in the cell was quantified using a protocol based on Fry's method (7). To release the polysaccharide-bound ferulic acid, 1 mL of 1 M NaOH was added to 10 mg of AIR and incubated under argon at 25 °C in the dark for 24 h. The pH was brought to ~1 by the addition of 2 M TFA and partitioning of the ferulate into the organic phase was achieved by addition of 1 mL of butan-1-ol, vigorous shaking, and removal of the upper organic phase for analysis. This partitioning was repeated twice. Finally, the organic phases were combined, the butan-1-ol was evaporated, and the residue was redissolved in 200  $\mu\text{L}$  of 50% (vol/vol) methanol. The extracted ferulic acid was analyzed using HPLC on an activated reverse-phase C18 5- $\mu\text{m}$  (4.6  $\times$  250 mm) XBridge column (Waters Inc.) in methanol:acetic acid (19:1, vol/vol), with a 20–70% (vol/vol) methanol gradient over 25 min at a flow rate of 2  $\text{mL}\cdot\text{min}^{-1}$ . Ferulic acid was detected and quantified with a SpectraSYSTEM UV6000LP photo-diode array detector (Thermo Scientific), with UV-visible spectra collected at 240–400 nm, and analyzed against a ferulic acid standard.

**Stem Mechanical Properties.** The strength and stiffness of mutant and WT stems were assessed using three-point bending tests, using a universal testing machine (model 3367; Instron). Stem segments were placed on two supports, separated by 2 cm, and a 2-mm pushing probe was manually lowered until just in contact with the stem. The pushing probe was set to automatically lower at a rate of 10 mm·min<sup>-1</sup>. Stem strength was measured by the maximum bending stress,  $\lambda_{\max}$  [ $\lambda_{\max} = F_{\max}Lr/4I$ , where  $F_{\max}$  is the maximum force the sample can withstand before failure,  $L$  is the distance between supports,  $r$  is the radius of the stem, and  $I$  is the second moment of the cross-sectional area of the stem ( $\pi r^4/4$ )]. Stem diameter was measured using a digital caliper. Stem stiffness was measured by the bending modulus (MPa), which is calculated by  $R/I$ , where  $R$  is the resistance of the stem to curvature [ $R = L^3(dF/dY)/48$ , where  $dF/dY$  is the initial slope of the force displacement curve acquired from the bending test].

**Mapping.** DNA from the top 40 BCF<sub>2</sub> plants with the highest saccharification was obtained by grinding  $\leq 100$  mg of leaf material in liquid nitrogen (LN), followed by extraction using a Biosprint 15 with a Biosprint 15 DNA Plant Kit, and quantified using a Qubit Fluorometer (Life Technologies). DNA from these 40 plants was pooled with equal concentrations and sent for Illumina paired-end whole-genome sequencing by The Genome Analysis Centre (TGAC). Twenty-one Gbp of data of high quality were achieved, giving an average coverage of 78.7 $\times$ . Assembly of the sequence data to the reference genome and identification of SNPs in the F<sub>2</sub> pools that did not occur in the WT dataset were performed by TGAC. SNPs were removed if they did not resemble a mutation caused by sodium azide mutagenesis (i.e., G to A, C to T, or A to T, and vice versa), if the phred quality score was  $<20$ , if the read depth was below five, and if the strand bias had a score of  $>1$ .

- Gomez LD, Whitehead C, Barakate A, Halpin C, McQueen-Mason SJ (2010) Automated saccharification assay for determination of digestibility in plant materials. *Biotechnol Biofuels* 3:23.
- Foster CE, Martin TM, Pauly M (2010) Comprehensive compositional analysis of plant cell walls (Lignocellulosic biomass). Part I: Lignin. *J Vis Exp* (37):e1745.
- Fukushima RS, Hatfield RD (2004) Comparison of the acetyl bromide spectrophotometric method with other analytical lignin methods for determining lignin concentration in forage samples. *J Agric Food Chem* 52(12):3713–3720.
- Foster CE, Martin TM, Pauly M (2010) Comprehensive compositional analysis of plant cell walls (Lignocellulosic biomass). Part II: Carbohydrates. *J Vis Exp* (37):e1745.
- Updegraff DM (1969) Semimicro determination of cellulose in biological materials. *Anal Biochem* 32(3):420–424.
- Jones L, Milne JL, Ashford D, McQueen-Mason SJ (2003) Cell wall arabinan is essential for guard cell function. *Proc Natl Acad Sci USA* 100(20):11783–11788.
- Fry S (1988) *The Growing Plant Cell Wall: Chemical and Metabolic Analysis* (Blackburn, Caldwell, NJ).

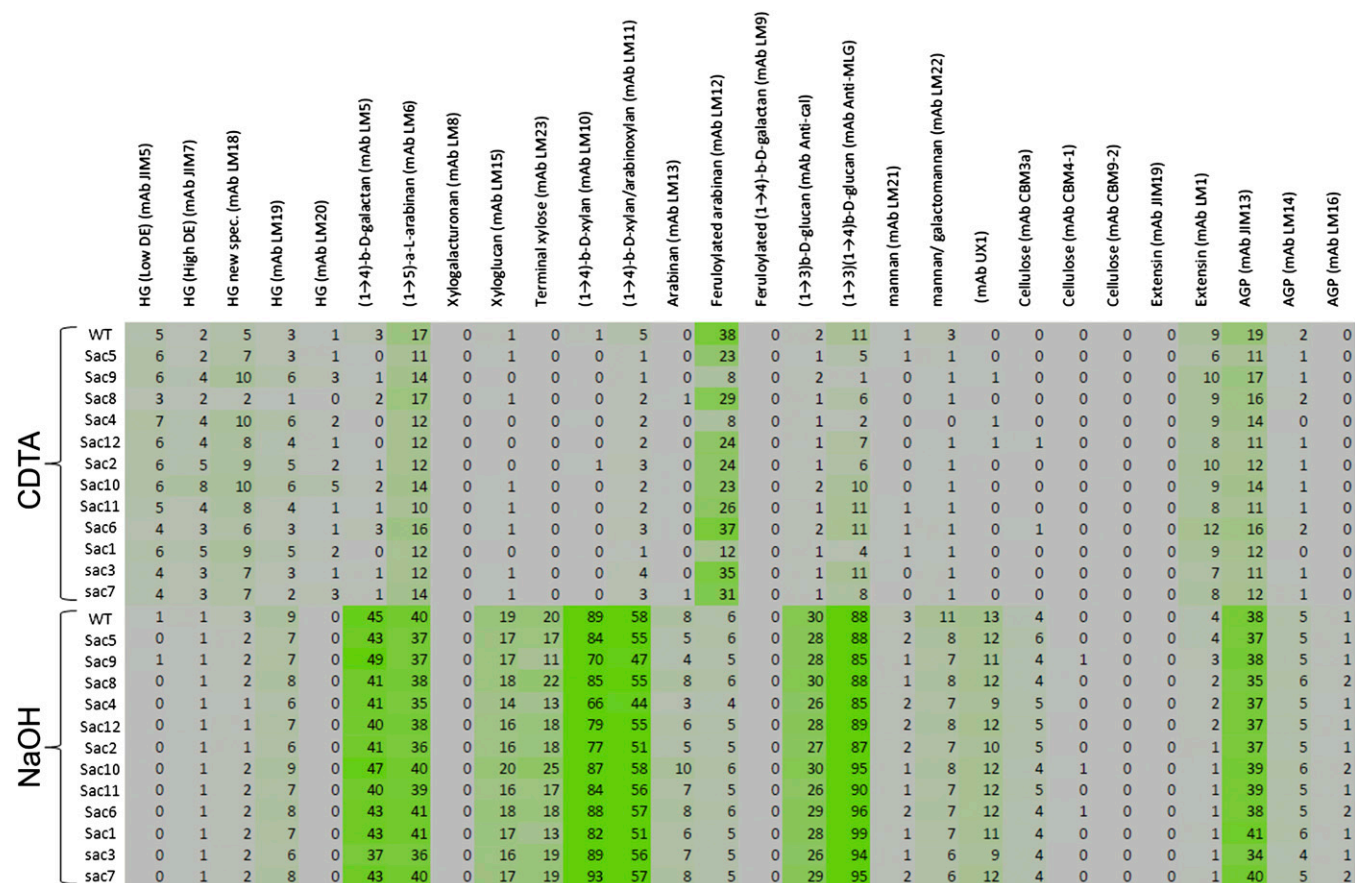

**Fig. S1.** Immunocarbhydrate microarray analysis of WT and sac AIR. The heatmap represents relative mean signal produced by the binding of each antibody to each sample. Samples were extracted with 1,2-cyclohexanedinitrilotetraacetic acid (CDTA) and 4 M NaOH. The maximal signal for each antibody was set to 100, and all other values were adjusted accordingly.  $n = 3$ .



**Table S1. Total thioacidolysis yield and lignin monomer relative mol % of WT and sac AIR**

| Line  | Thioacidolysis yield, $\mu\text{mol}\cdot\text{g}^{-1}$ AIR | % H            | % G             | % S             | S:G ratio |
|-------|-------------------------------------------------------------|----------------|-----------------|-----------------|-----------|
| WT    | 142.0 $\pm$ 5.4                                             | 3.2 $\pm$ 0.1  | 26.7 $\pm$ 0.7  | 70.1 $\pm$ 0.7  | 2.63      |
| sac1  | 96.3 $\pm$ 3.6*                                             | 5.2 $\pm$ 0.1* | 34.3 $\pm$ 1.3  | 60.6 $\pm$ 1.2* | 1.78*     |
| sac2  | 97.8 $\pm$ 1.8*                                             | 4.9 $\pm$ 0.2* | 28.3 $\pm$ 0.4  | 66.8 $\pm$ 0.5  | 2.36      |
| sac3  | 116.5 $\pm$ 8.3                                             | 4.17 $\pm$ 0.2 | 27.5 $\pm$ 0.3  | 68.3 $\pm$ 0.4  | 2.49      |
| sac4  | 79.4 $\pm$ 3.4*                                             | 5.1 $\pm$ 0.1* | 34.4 $\pm$ 0.1* | 60.5 $\pm$ 0.0* | 1.76*     |
| sac5  | 114.7 $\pm$ 0.9*                                            | 4.1 $\pm$ 0.3  | 27.3 $\pm$ 0.2  | 68.6 $\pm$ 0.3  | 2.51      |
| sac6  | 97.9 $\pm$ 7.6                                              | 5.1 $\pm$ 0.2* | 34.8 $\pm$ 0.6* | 60.1 $\pm$ 0.8* | 1.73*     |
| sac7  | 78.4 $\pm$ 9.7                                              | 5.6 $\pm$ 0.2* | 35.8 $\pm$ 0.6* | 58.6 $\pm$ 0.4* | 1.64*     |
| sac8  | 146.2 $\pm$ 3.9                                             | 3.4 $\pm$ 0.2  | 25.8 $\pm$ 0.3  | 70.9 $\pm$ 0.5  | 2.75      |
| sac9  | 93.0 $\pm$ 2.2*                                             | 5.4 $\pm$ 0.1* | 33.3 $\pm$ 1.2  | 61.2 $\pm$ 1.2* | 1.84      |
| sac10 | 155.1 $\pm$ 9.1                                             | 3.1 $\pm$ 0.2  | 28.0 $\pm$ 0.9  | 68.9 $\pm$ 1.1  | 2.47      |
| sac11 | 119.8 $\pm$ 6.9                                             | 4.0 $\pm$ 0.1  | 28.7 $\pm$ 0.5  | 67.3 $\pm$ 0.6  | 2.34      |
| sac12 | 139.2 $\pm$ 2.2                                             | 3.7 $\pm$ 0.1  | 26.8 $\pm$ 0.7  | 69.5 $\pm$ 0.6  | 2.59      |

Data show mean  $\pm$  SD,  $n = 3$ . Asterisks indicate significant difference ( $P \leq 0.01$ ) compared with WT.

**Table S2. Monosaccharide composition of matrix polysaccharides in WT and sac plants ( $\mu\text{g}\cdot\text{g}^{-1}$  AIR)**

| Line  | Fucose           | Arabinose         | Galactose         | Glucose           | Xylose              | Mannose           |
|-------|------------------|-------------------|-------------------|-------------------|---------------------|-------------------|
| WT    | 2.09 $\pm$ 0.99  | 82.98 $\pm$ 3.95  | 49.72 $\pm$ 3.76  | 53.33 $\pm$ 2.76  | 118.22 $\pm$ 5.80   | 18.98 $\pm$ 2.18  |
| sac1  | 3.15 $\pm$ 0.45  | 86.56 $\pm$ 4.04  | 51.17 $\pm$ 3.57  | 51.43 $\pm$ 2.46  | 123.32 $\pm$ 7.99   | 17.23 $\pm$ 2.20  |
| sac2  | 2.40 $\pm$ 0.78  | 87.99 $\pm$ 7.44  | 50.18 $\pm$ 2.64  | 54.25 $\pm$ 4.09  | 123.32 $\pm$ 7.47   | 16.83 $\pm$ 2.82  |
| sac3  | 1.47 $\pm$ 0.80  | 79.32 $\pm$ 4.26  | 44.42 $\pm$ 3.52  | 61.89 $\pm$ 20.57 | 107.85 $\pm$ 5.91   | 27.48 $\pm$ 3.83* |
| sac4  | 4.53 $\pm$ 0.35* | 95.74 $\pm$ 5.83* | 57.54 $\pm$ 5.14  | 55.98 $\pm$ 4.39  | 133.30 $\pm$ 7.28*  | 28.73 $\pm$ 0.31* |
| sac5  | 3.03 $\pm$ 1.32  | 94.70 $\pm$ 4.04* | 55.67 $\pm$ 1.41  | 58.40 $\pm$ 0.31  | 135.18 $\pm$ 2.45*  | 28.49 $\pm$ 6.46* |
| sac6  | 2.66 $\pm$ 0.58  | 87.20 $\pm$ 6.72  | 51.71 $\pm$ 4.56  | 58.85 $\pm$ 2.97  | 123.30 $\pm$ 8.17   | 17.34 $\pm$ 0.92  |
| sac7  | 2.77 $\pm$ 0.86  | 99.33 $\pm$ 6.90* | 58.96 $\pm$ 8.37  | 68.05 $\pm$ 2.75* | 159.02 $\pm$ 14.40* | 38.64 $\pm$ 4.76* |
| sac8  | 1.76 $\pm$ 0.38  | 71.46 $\pm$ 4.90* | 45.72 $\pm$ 4.88  | 50.10 $\pm$ 1.94  | 100.54 $\pm$ 4.09*  | 30.73 $\pm$ 4.57* |
| sac9  | 3.45 $\pm$ 0.18  | 92.25 $\pm$ 3.19* | 56.36 $\pm$ 1.40* | 52.73 $\pm$ 1.08  | 125.42 $\pm$ 7.14   | 22.65 $\pm$ 1.17* |
| sac10 | 1.69 $\pm$ 0.83  | 80.49 $\pm$ 3.26  | 49.06 $\pm$ 2.38  | 60.79 $\pm$ 6.90  | 118.94 $\pm$ 1.84   | 18.56 $\pm$ 1.24  |
| sac11 | 2.12 $\pm$ 0.51  | 86.67 $\pm$ 10.64 | 47.69 $\pm$ 4.08  | 63.47 $\pm$ 14.75 | 124.06 $\pm$ 12.41  | 16.31 $\pm$ 1.99  |
| sac12 | 2.26 $\pm$ 1.23  | 82.26 $\pm$ 12.97 | 46.86 $\pm$ 6.40  | 53.55 $\pm$ 3.34  | 116.63 $\pm$ 14.39  | 26.03 $\pm$ 1.43* |

Data show mean  $\pm$  SD,  $n = 3$ . Asterisks indicate significant difference ( $P \leq 0.05$ ) compared with WT.

**Table S3. SNPs in the 14-SNP cluster with allele frequencies  $\geq 0.9$  in chromosome 2 of the sac1 mutant**

| SNP position | Ref base | Alt base | Region    | Gene    | Annotation                      | Ref aa    | Alt aa    |
|--------------|----------|----------|-----------|---------|---------------------------------|-----------|-----------|
| 1022576      | G        | A        | Exon      | 2g01480 | Glycosyltransferase family GT61 | Glycine   | Serine    |
| 1116925      | C        | T        | Noncoding |         |                                 |           |           |
| 1116938      | A        | G        | Noncoding |         |                                 |           |           |
| 1206457      | T        | C        | Noncoding |         |                                 |           |           |
| 1577928      | G        | A        | Noncoding |         |                                 |           |           |
| 1666374      | G        | A        | Exon      | 2g02510 | Protein kinase family           | Threonine | Threonine |
| 1675680      | C        | T        | Exon      | 2g02520 | Putative protein                | Proline   | Leucine   |
| 1692493      | T        | C        | Intron    |         |                                 |           |           |
| 3523570      | T        | C        | Noncoding |         |                                 |           |           |
| 3523571      | G        | A        | Noncoding |         |                                 |           |           |
| 3527190      | T        | C        | Noncoding |         |                                 |           |           |
| 3644990      | C        | T        | Noncoding |         |                                 |           |           |
| 3648056      | T        | C        | Noncoding |         |                                 |           |           |
| 3663412      | T        | C        | Noncoding |         |                                 |           |           |
